# Supplementary material for: Metabolic Fingerprinting to Assess the Impact of Salinity on Carotenoid Content in Developing Tomato Fruits
Source: MDPI journal article supplement (doi:10.3390/ijms17060821), 2016-05-26
Supplement: s1 [file s1]

# Supplementary Materials: Metabolic Fingerprinting to Assess the Impact of Salinity on Carotenoid Content in Developing Tomato Fruits

Lieven Van Meulebroek, Jochen Hanssens, Kathy Steppe and Lynn Vanhaecke

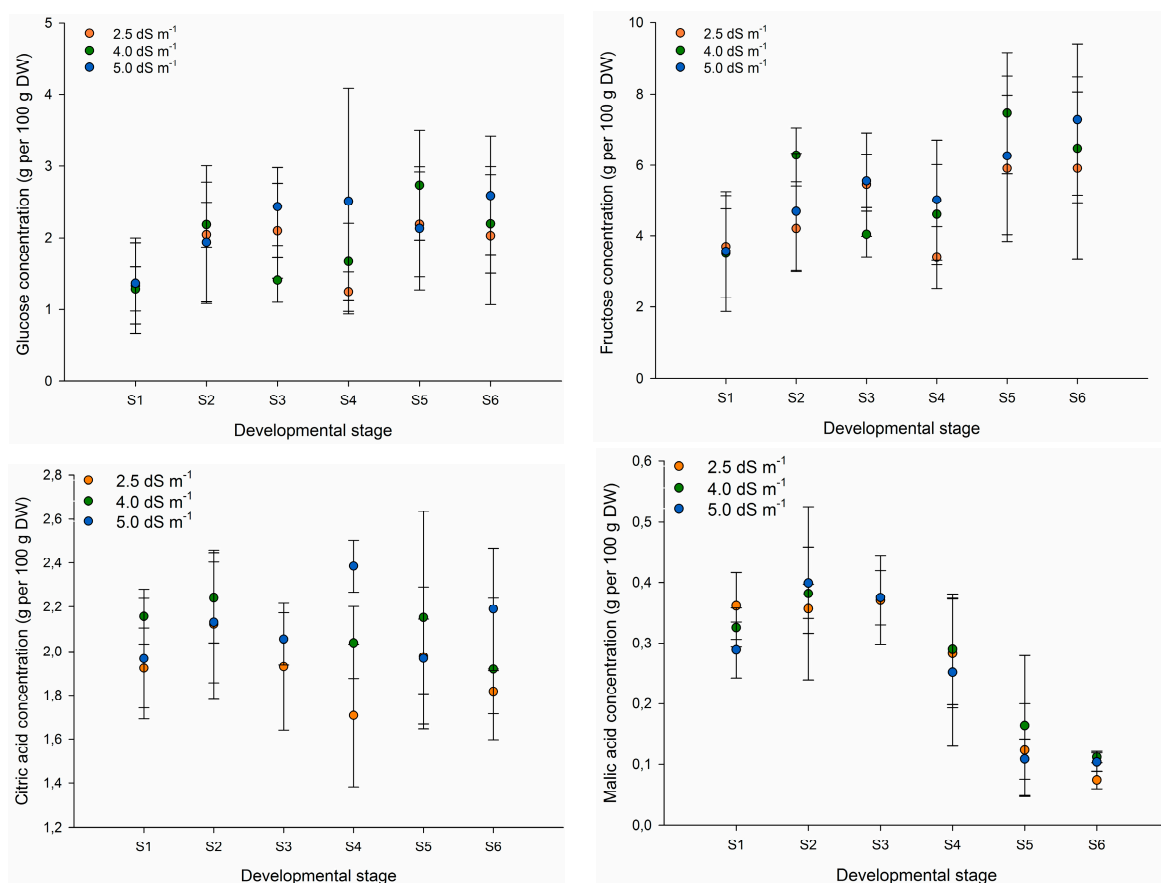

**Figure S1.** Measured average concentrations (g per 100 g dry weight (DW)) for glucose, fructose, citric acid, and malic acid during fruit development (developmental stages S1–S6) and under different (electrical conductivity) EC-treatments (2.5, 4.0 and 5.0 decisiemens (dS) m<sup>-1</sup>). Each measurement point represents the average of 6 samples, with each sample being the homogenized sample of two fruits. Measurement variation is indicated by the standard deviation.

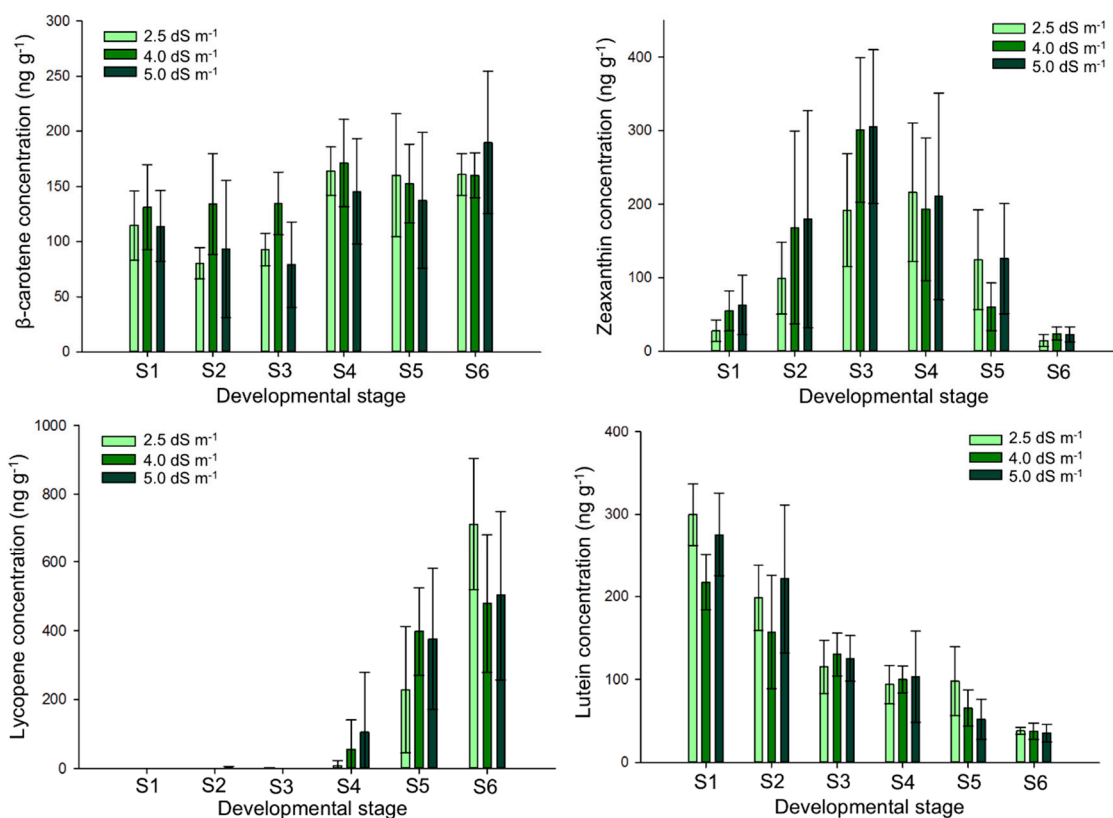

**Figure S2.** Carotenoid concentration levels (on a dry weight basis) for the various developmental stages and EC-treatments of 2.5, 4.0 and 5.0  $\text{dS m}^{-1}$  ( $n = 6$ , standard deviation).

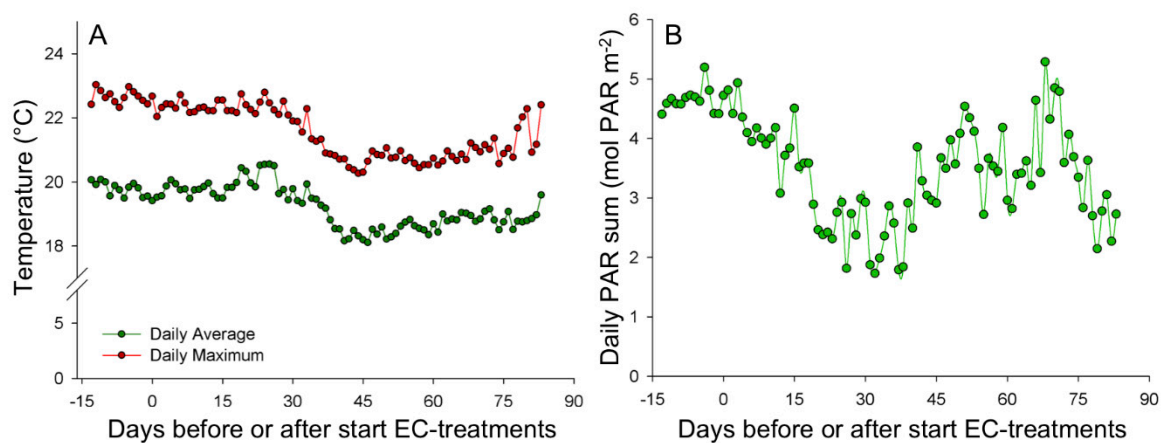

**Figure S3.** Average and maximum daily air temperatures (A), recorded inside the greenhouse compartment during the experiment; the daily photosynthetic active radiation (PAR) sum (B) was determined as well and comprised natural and artificially supplemented PAR-radiation. The microclimatic data are expressed in function of the number of days after or before the actual start of the EC-treatments, *i.e.*, when nutrient solutions reached their final EC-levels (12 December 2013).
